# Supplementary material
Source: PubMed Central journal article supplement (PMC3443783)
Supplement: mmc1.pdf [file mmc1.pdf]

# **Transfer of Kv3.1 Voltage Sensor Features to the Isolated Ci-VSP Voltage-Sensing Domain**

Yukiko Mishina, Hiroki Mutoh, and Thomas Knöpfel

RIKEN Brain Science Institute, Saitama, JAPAN

**Supporting Material**

| Construct Name         | AA of Ci-VSP replaced <sup>a</sup> | AA of Kv3.1 transferred <sup>b</sup> | $\Delta R/R$ (%) <sup>c</sup> |
|------------------------|------------------------------------|--------------------------------------|-------------------------------|
| VSFP2.3 (Ci-VSP R217Q) |                                    |                                      | 12.1                          |
| C1                     | 227-240                            | 321-334                              | 9.6                           |
| C2                     | 227-239                            | 321-333                              | 11.3                          |
| C3                     | 227-238                            | 321-332                              | 8.3                           |
| C4                     | 227-237                            | 321-331                              | 9.3                           |
| C 5                    | 227-236                            | 321-330                              | 10.7                          |
| C 6                    | 224-236                            | 319-330                              | 12.9                          |
| C 7                    | 222-236                            | 317-330                              | 2.2                           |
| C 8                    | 217-236                            | 312-330                              | 2.1                           |
| C 9                    | 215-236                            | 310-330                              | 0.2                           |
| C 10                   | 206-236                            | 300-330                              | 1.3                           |
| C 11                   | 194-236                            | 290-330                              | 0.4                           |
| C 12                   | 189-236                            | 285-330                              | 0.6                           |
| C 13                   | 189-226                            | 285-320                              | 0.5                           |
| C 14                   | 188-226                            | 284-320                              | 0.5                           |
| C 15                   | 188-236                            | 284-330                              | 3.3                           |
| C 16                   | 188-239                            | 284-333                              | -                             |
| C 17                   | 178-236                            | 274-330                              | 1.3                           |
| C 18                   | 173-236                            | 269-330                              | -                             |
| C 19                   | 145-236                            | 241-330                              | -                             |
| C 20                   | 144-236                            | 212-330                              | 5.2                           |
| C 21                   | 143-236                            | 210-330                              | 5.6                           |
| C 22                   | 142-240                            | 209-334                              | 3.0                           |
| C 23                   | 142-239                            | 209-333                              | 6.5                           |
| C 24                   | 142-238                            | 209-332                              | 3.5                           |
| C 25                   | 142-237                            | 209-331                              | 6.4                           |
| C 26                   | 142-236                            | 209-330                              | 5.8                           |
| C 27                   | 142-235                            | 209-329                              | 6.4                           |
| C 28                   | 142-234                            | 209-328                              | 5.5                           |
| C 29                   | 141-236                            | 208-330                              | -                             |
| C 30                   | 140-236                            | 207-330                              | 3.1                           |
| C 31                   | 139-236                            | 206-330                              | 2.4                           |
| C 32                   | 138-236                            | 205-330                              | 1.7                           |
| C 33                   | 136-236                            | 203-330                              | 1.0                           |
| C 34                   | 130-236                            | 197-330                              | -                             |
| C 35                   | 125-236                            | 192-330                              | -                             |
| C 36                   | 121-236                            | 188-330                              | -                             |
| C 37                   | 117-236                            | 191-330                              | -                             |
| C 38                   | 110-236                            | 184-330                              | -                             |
| C 39                   | 1-236                              | 1-330                                | -                             |
| C 40                   | 1-226                              | 1-320                                | -                             |

**Table S1** Summary of chimeric constructs with regions of Ci-VSP VSD replaced by portions of Kv3.1.

<sup>a</sup>Amino acids removed from Ci-VSP to be replaced by the homologous amino acids of Kv3.1

<sup>b</sup>Amino acids of Kv3.1 that replaced the corresponding amino acids of Ci-VSP. <sup>c</sup>Ratiometric FRET responses from a two-step voltage protocol of -100 mV to 60 mV from a holding potential of -70 mV at room temperature.

|                   | $\tau_1$ on | $\tau_2$ on | % $\tau_1$ | $\tau_1$ off | $V_{1/2}$ fast   | $V_{1/2}$ slow | $V_{1/2}$ off | $\Delta R/R$ (%) |
|-------------------|-------------|-------------|------------|--------------|------------------|----------------|---------------|------------------|
| <b>VSFP2.3</b>    | 3.0 ± 0.4   | 69.2 ± 4.3  | 26.6       | 91.6 ± 4.2   | -28.3 ± 1.3      | -48.6 ± 1.2    | -28.2 ± 0.9   | 15.2 ± 0.2       |
| <b>VSFP2.3 RT</b> | 6.0 ± 1.2   | 120. ± 4    | 24.3       | 145.4 ± 5.4  | -17.8 ± 2.7      | -48.1 ± 1.0    | -26.0 ± 0.3   | 15.6 ± 0.2       |
| <b>C1</b>         | 2.6 ± 0.6   | 34.9 ± 1.8  | 62.8       | 12.8 ± 0.6   | 11.0 ± 2.1       | ≥20            | ≥20           | 17.9 ± 0.03      |
| <b>C1 RT</b>      | 5.1 ± 0.5   | 62.1 ± 6.2  | 59.8       | 33.2 ± 4.1   | n/a <sup>a</sup> | ≥20            | ≥20           | 17.5 ± 1.4       |
| <b>C2</b>         | 2.2 ± 0.4   | 39.2 ± 1.7  | 59.7       | 17.0 ± 0.6   | -20.0 ± 2.2      | ≥20            | ≥20           | 19.7 ± 0.06      |
| <b>C2 RT</b>      | 6.5 ± 0.3   | 72.7 ± 2.5  | 56.4       | 36.0 ± 3.3   | -29.8 ± 2.0      | ≥20            | ≥20           | 13.9 ± 0.04      |
| <b>C5</b>         | 2.1 ± 0.5   | 36.8 ± 2.7  | 60.1       | 13.4 ± 1.5   | -17.9 ± 1.2      | ≥20            | ≥20           | 14.8 ± 0.2       |
| <b>C5 RT</b>      | 2.8 ± 0.4   | 43.2 ± 3.8  | 58.1       | 15.8 ± 1.9   | -8.6 ± 1.0       | ≥20            | ≥20           | 14.6 ± 0.2       |
| <b>C25</b>        | 1.8 ± 0.1   | n/a         | 100        | 1.8 ± 0.2    | -27.6 ± 1.8      | n/a            | -25.6 ± 0.5   | 6.4 ± 0.3        |
| <b>C25 RT</b>     | 2.3 ± 0.4   | n/a         | 100        | 3.9 ± 0.2    | -34.3 ± 2.2      | n/a            | -36.4 ± 0.8   | 6.1 ± 0.8        |
| <b>K229R</b>      | 2.0 ± 0.4   | 34.1 ± 2.4  | 49.1       | 16.8 ± 2.1   | -63.6 ± 3.0      | n/a            | -69.2 ± 2.0   | 12.7 ± 0.4       |

**Table S2** Temperature dependency of the chimeric Ci-VSP-Kv3.1 VSD and properties of chimera C5 with K229R mutation.

|            | $\tau_1$ on | $\tau_2$ on | % $\tau_1$ | $\tau_1$ off | $\Delta R/R$ (%) |
|------------|-------------|-------------|------------|--------------|------------------|
| <b>C7</b>  | 37.7 ± 6.3  | -           |            | 29.5 ± 1.4   | 2.2              |
| <b>C15</b> | 15.5 ± 6.0  | 60.7 ± 42.6 | 43.1       | 33 ± 4       | 3.3              |
| <b>C22</b> | 2.1 ± 0.3   | -           |            | 3.8 ± 0.4    | 3.0              |
| <b>C24</b> | 2.9 ± 0.3   | -           |            | 3.6 ± 0.3    | 3.5              |
| <b>C30</b> | 4.3 ± 0.6   | -           |            | 5.5 ± 1.1    | 3.1              |
| <b>C31</b> | 5.5 ± 0.6   | -           |            | 31 ± 6       | 2.4              |

**Table S3** Kinetic properties of the chimeric Ci-VSP-Kv3.1 VSD that display FRET signals between 2-5% at room temperature. C8 was not analyzed as the fluorescence signal was biphasic.
